# Supplementary material for: Evidence on the Conceptual Distinctness of Normal Grief From Depression
Source: Atypon-hosted journal article supplement (doi:10.1027/2512-8442/a000077), 2021-05-03
Supplement: 2512-8442_a000077_esm1.pdf [file 2512-8442_a000077_esm1.pdf]

Table E1: Factor loadings after Varimax rotation

| Scale       | Item | 1            | 2            | 3            | 4            | 5            | communalities |
|-------------|------|--------------|--------------|--------------|--------------|--------------|---------------|
| Impairments | 1    | <b>0.642</b> | -0.263       | 0.090        | 0.057        | 0.209        | 0.536         |
| Impairments | 2    | <b>0.601</b> | -0.213       | 0.110        | 0.069        | 0.265        | 0.493         |
| Impairments | 3    | <b>0.561</b> | -0.268       | 0.223        | 0.072        | 0.343        | 0.560         |
| Impairments | 4    | <b>0.725</b> | -0.206       | 0.019        | 0.064        | 0.174        | 0.603         |
| Impairments | 5    | <b>0.521</b> | -0.319       | 0.192        | 0.103        | 0.299        | 0.510         |
| Impairments | 6    | <b>0.593</b> | -0.174       | 0.158        | -0.060       | 0.171        | 0.439         |
| Impairments | 7    | <b>0.618</b> | -0.235       | 0.205        | 0.040        | 0.093        | 0.489         |
| Impairments | 8    | <b>0.621</b> | -0.236       | 0.299        | 0.025        | 0.277        | 0.608         |
| Growth      | 1    | -0.197       | <b>0.806</b> | -0.050       | 0.144        | 0.033        | 0.714         |
| Growth      | 2    | -0.189       | <b>0.790</b> | -0.080       | 0.226        | 0.019        | 0.718         |
| Growth      | 3    | -0.158       | <b>0.785</b> | -0.076       | 0.208        | 0.133        | 0.707         |
| Growth      | 4    | -0.215       | <b>0.726</b> | -0.132       | 0.183        | 0.211        | 0.669         |
| Guilt       | 1    | 0.233        | -0.169       | <b>0.791</b> | 0.047        | 0.038        | 0.713         |
| Guilt       | 2    | 0.205        | -0.021       | <b>0.828</b> | 0.020        | 0.096        | 0.737         |
| Guilt       | 3    | 0.214        | -0.016       | <b>0.712</b> | -0.026       | 0.128        | 0.570         |
| Guilt       | 4    | 0.260        | -0.127       | <b>0.802</b> | 0.024        | -0.005       | 0.727         |
| Empathy     | 1    | -0.148       | 0.411        | 0.035        | <b>0.567</b> | 0.050        | 0.516         |
| Empathy     | 2    | 0.004        | 0.154        | -0.082       | <b>0.832</b> | 0.052        | 0.725         |
| Empathy     | 3    | -0.055       | 0.217        | 0.085        | <b>0.760</b> | -0.015       | 0.636         |
| Empathy     | 4    | 0.004        | 0.065        | 0.015        | <b>0.868</b> | -0.006       | 0.759         |
| Nearness    | 1    | 0.055        | 0.280        | -0.020       | 0.087        | <b>0.703</b> | 0.583         |

|                    |    |               |        |       |        |              |       |
|--------------------|----|---------------|--------|-------|--------|--------------|-------|
| Nearness           | 2  | 0.083         | -0.160 | 0.126 | -0.059 | <b>0.636</b> | 0.456 |
| Nearness           | 3  | 0.256         | 0.067  | 0.051 | 0.211  | <b>0.667</b> | 0.562 |
| Nearness           | 4  | 0.118         | 0.238  | 0.038 | -0.149 | <b>0.583</b> | 0.434 |
| GDS-S              | 1  | <b>0.654</b>  | 0.047  | 0.183 | -0.004 | -0.054       | 0.467 |
| GDS-S              | 2  | <b>0.694</b>  | -0.159 | 0.027 | -0.043 | 0.023        | 0.510 |
| GDS-S              | 3  | <b>0.782</b>  | 0.041  | 0.088 | -0.037 | -0.003       | 0.622 |
| GDS-S              | 4  | <b>0.816</b>  | -0.162 | 0.147 | -0.072 | -0.012       | 0.719 |
| GDS-S              | 5  | <b>0.771</b>  | 0.069  | 0.050 | -0.105 | 0.037        | 0.614 |
| GDS-S              | 6  | <b>0.577</b>  | -0.153 | 0.326 | -0.063 | 0.061        | 0.470 |
| GDS-S              | 7  | <b>0.633</b>  | 0.060  | 0.306 | -0.059 | -0.046       | 0.504 |
| GDS-S              | 8  | <b>0.575</b>  | -0.003 | 0.169 | -0.057 | 0.144        | 0.383 |
| GDS-S              | 9  | <b>0.666</b>  | -0.347 | 0.035 | -0.023 | 0.131        | 0.582 |
| GDS-S              | 10 | <b>0.606</b>  | -0.131 | 0.022 | -0.015 | 0.045        | 0.388 |
| GDS-S              | 11 | <b>0.608</b>  | -0.204 | 0.183 | 0.005  | 0.005        | 0.445 |
| GDS-S              | 12 | <b>0.556</b>  | -0.405 | 0.114 | -0.094 | 0.188        | 0.531 |
| GDS-S              | 13 | <b>0.691</b>  | -0.208 | 0.188 | -0.002 | 0.182        | 0.589 |
| GDS-S              | 14 | <b>0.461</b>  | 0.135  | 0.255 | -0.138 | -0.202       | 0.356 |
| GDS-S              | 15 | <b>0.759</b>  | 0.024  | 0.048 | -0.065 | 0.028        | 0.584 |
| Variance explained |    | <b>25.83%</b> | 9.84%  | 8.30% | 6.86%  | 6.17%        |       |

Note:

Bold numbers show the largest factor loading for each item. WGI-Items were not presented in this order to the subjects, but are rearranged according to subscale to ease comparisons.

Table E2: Partial and semipartial correlations of grief (subscales of WGI) with depression (GDS-S)

|             | male subjects (n=100) |             | female subjects (n=295) |             |
|-------------|-----------------------|-------------|-------------------------|-------------|
|             | partial               | semipartial | partial                 | semipartial |
| impairments | .579                  | .464        | .720                    | .577        |
| growth      | -.098                 | -.098       | -.126                   | -.071       |
| Guilt       | .221                  | .221        | .145                    | .082        |
| empathy     | -.168                 | -.168       | -.050                   | -.028       |
| nearness    | .151                  | .151        | .001                    | .000        |
